# Supplementary material for: PREPARATION OF CARBON FIBERS FROM PETROLEUM TAR.
Source: Royal Society of Chemistry journal article supplement (doi:10.1039/d1dt04102a), 1971-01-01
Supplement: d1dt04102a1.pdf [file d1dt04102a1.pdf]

Electronic Supplementary Information for

**Understanding the factors in the catalytic nitrite reduction cycle by bio-inspired copper(II) complexes**

Yu-Lun Chang<sup>[a]</sup>, Hsing-Yin Chen<sup>[a]</sup>, Si-Hong Chen<sup>[a]</sup>, Chai-Lin Kao<sup>[a]</sup>, Michael Y. Chiang<sup>[b]</sup>, Sodio C. N. Hsu<sup>\*[a][b]</sup>

<sup>a</sup>*Department of Medicinal and Applied Chemistry, Kaohsiung Medical University, Kaohsiung 807, Taiwan; Department of Medical Research, Kaohsiung Medical University Hospital, Kaohsiung 807, Taiwan*

<sup>b</sup>*Department of Chemistry, National Sun Yat-Sen University, Kaohsiung 804, Taiwan*

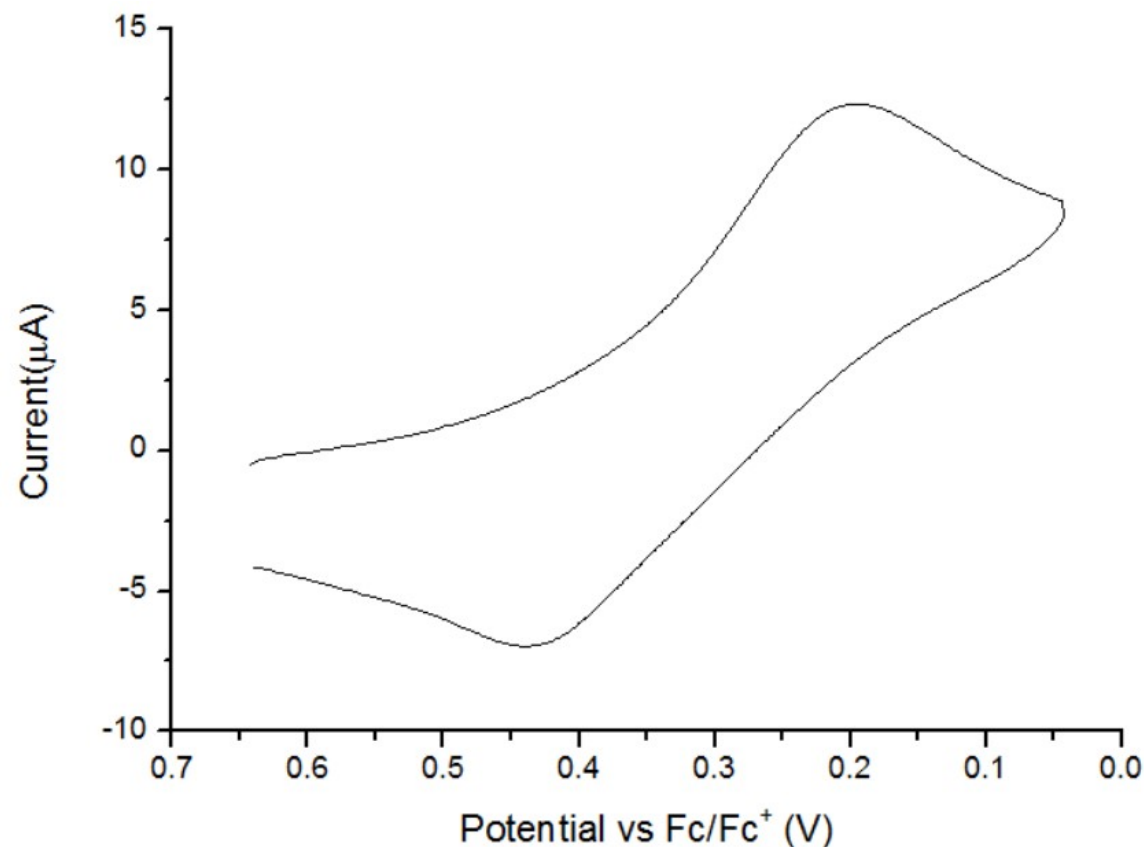

**Figure S1.** Cyclic voltammetry of  $\text{Me}_2\text{TpmCu}^{\text{II}}(\text{NO}_3)_2$  where the measured reduction peak is 0.20 V and  $E_{1/2}$  is 0.32 V vs. Fc and the. Cyclic voltammetry measurements were taken in  $10^{-4}$  M  $\text{CH}_3\text{OH}$  solutions using 0.1 M  $(\text{Bu}_4\text{N})(\text{PF}_6)$  as supporting electrolyte and referenced to  $\text{Fc}^{+/0}$ .

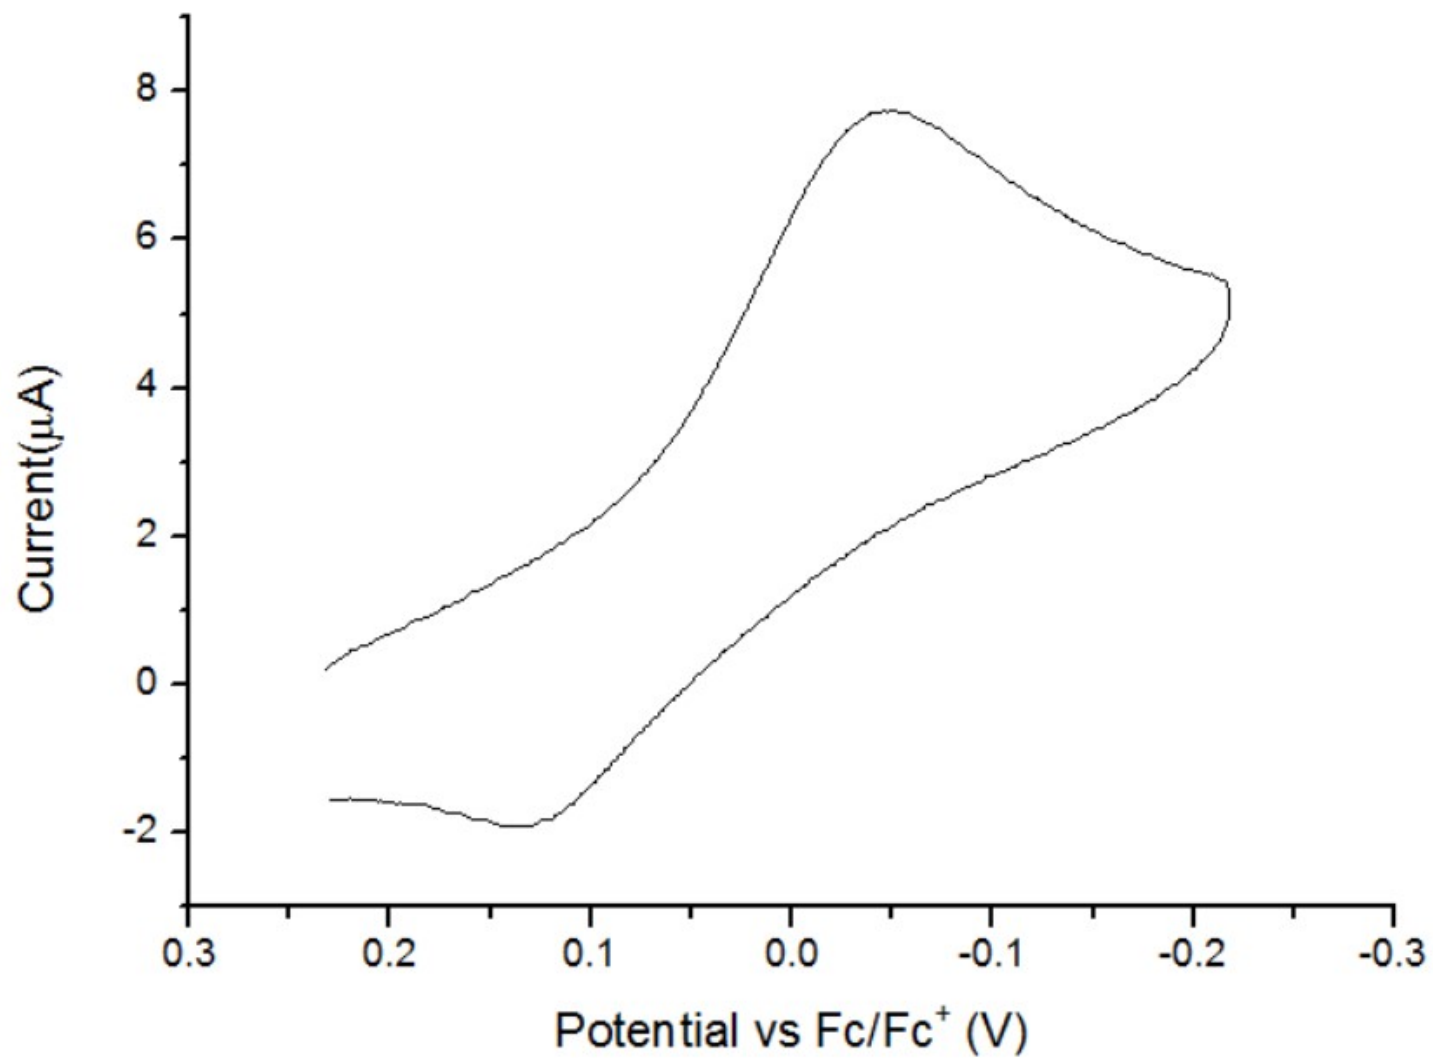

**Figure S2.** Cyclic voltammetry of  $\text{Me}^2\text{TpCu}^{\text{II}}\text{NO}_3$  where the measured reduction peak is -0.05 V and  $E_{1/2}$  is 0.04 V vs. Fc. Cyclic voltammetry measurements were taken in  $10^{-4}$  M  $\text{CH}_3\text{OH}$  solutions using 0.1 M  $(\text{Bu}_4\text{N})(\text{PF}_6)$  as supporting electrolyte and referenced to  $\text{Fc}^{+/0}$ .

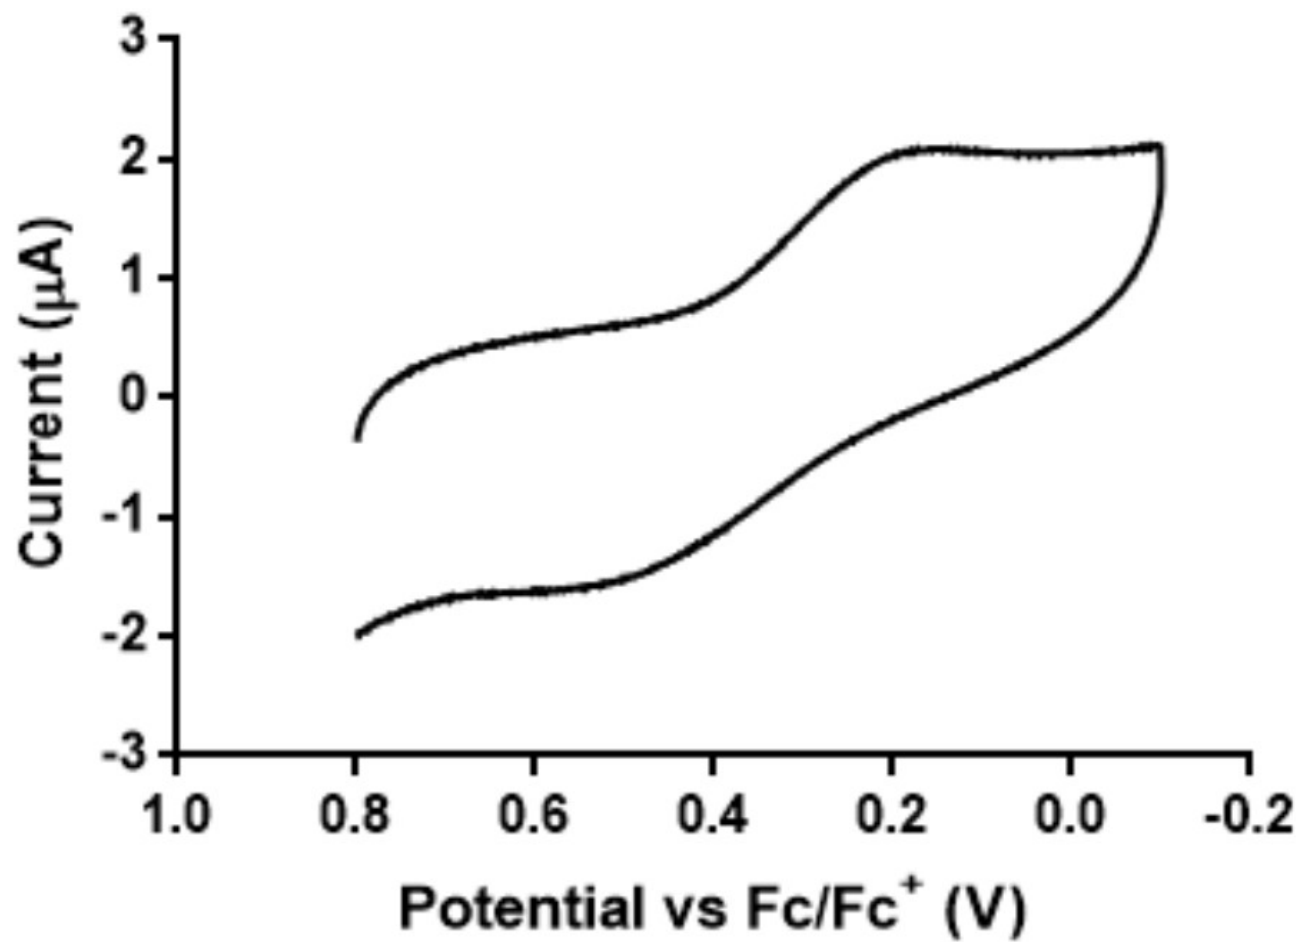

**Figure S3.** Cyclic voltammetry of  $i\text{PrTICCu}^{\text{II}}(\text{NO}_3)_2$  where the measured reduction peak is 0.17 V and  $E_{1/2}$  is 0.32 V vs. Fc. Cyclic voltammetry measurements were taken in  $10^{-4}$  M  $\text{CH}_3\text{OH}$  solutions using 0.1 M  $(\text{Bu}_4\text{N})(\text{PF}_6)$  as supporting electrolyte and referenced to  $\text{Fc}^{+/0}$ .

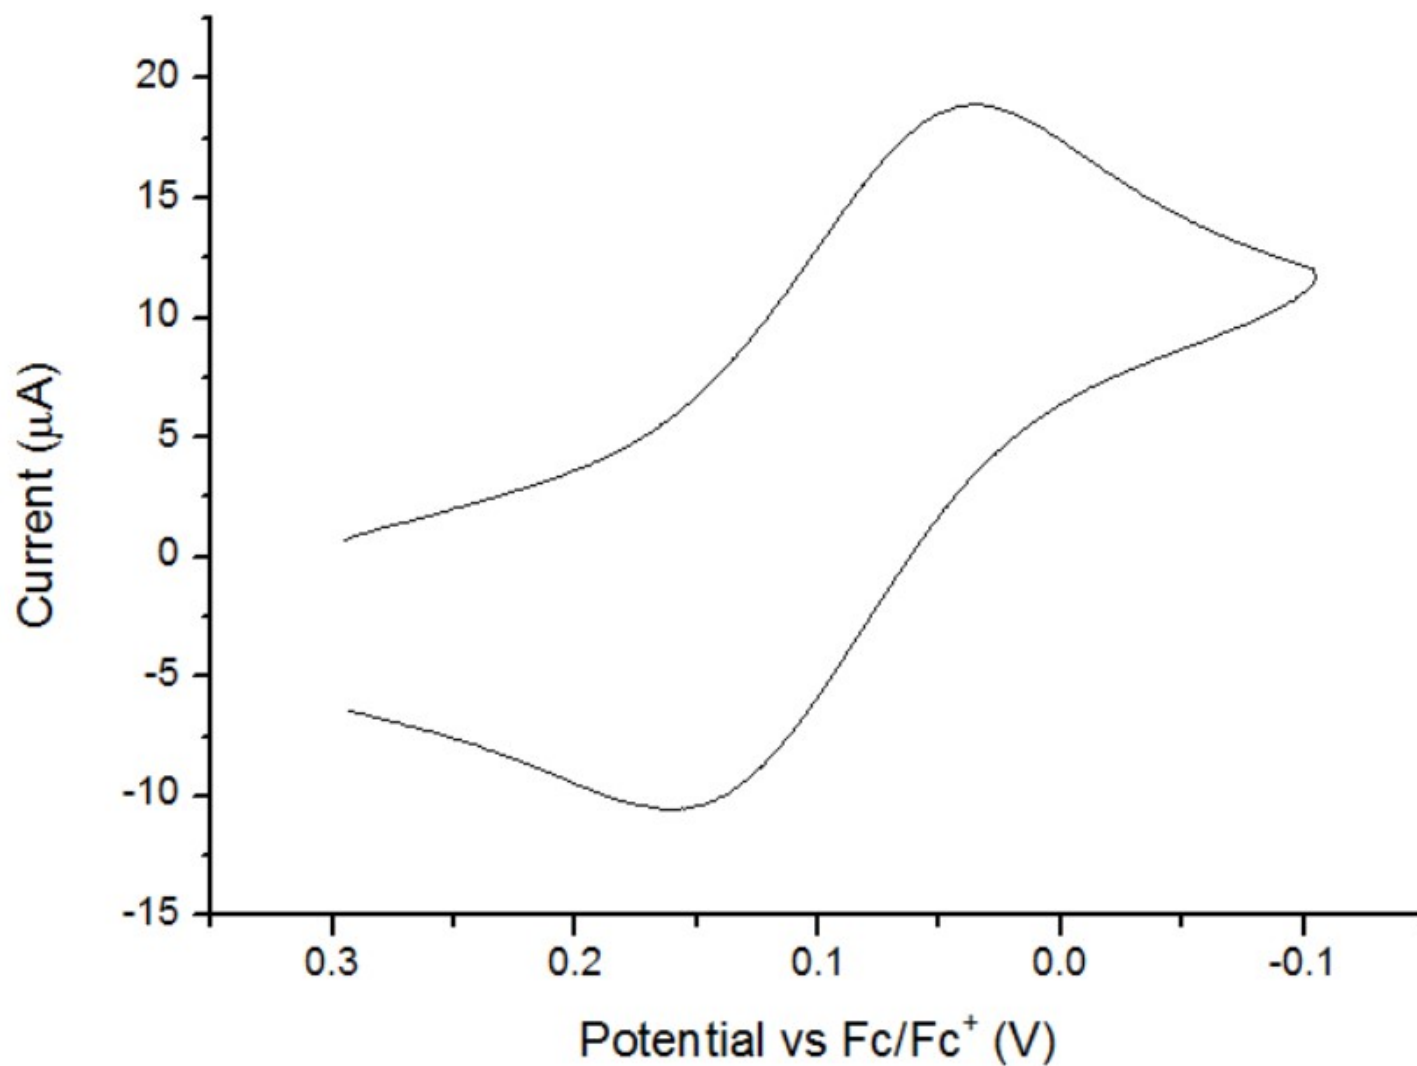

**Figure S4.** Cyclic voltammetry of  $\text{Cu}^{\text{II}}(\text{NO}_3)_2 \cdot 3\text{H}_2\text{O}$  salt where the measured reduction peak is 0.04 V and  $E_{1/2}$  is 0.095 V vs. Fc. Cyclic voltammetry measurements were taken in  $10^{-4}$  M  $\text{CH}_3\text{OH}$  solutions using 0.1 M  $(\text{Bu}_4\text{N})(\text{PF}_6)$  as supporting electrolyte and referenced to  $\text{Fc}^{+/0}$ .

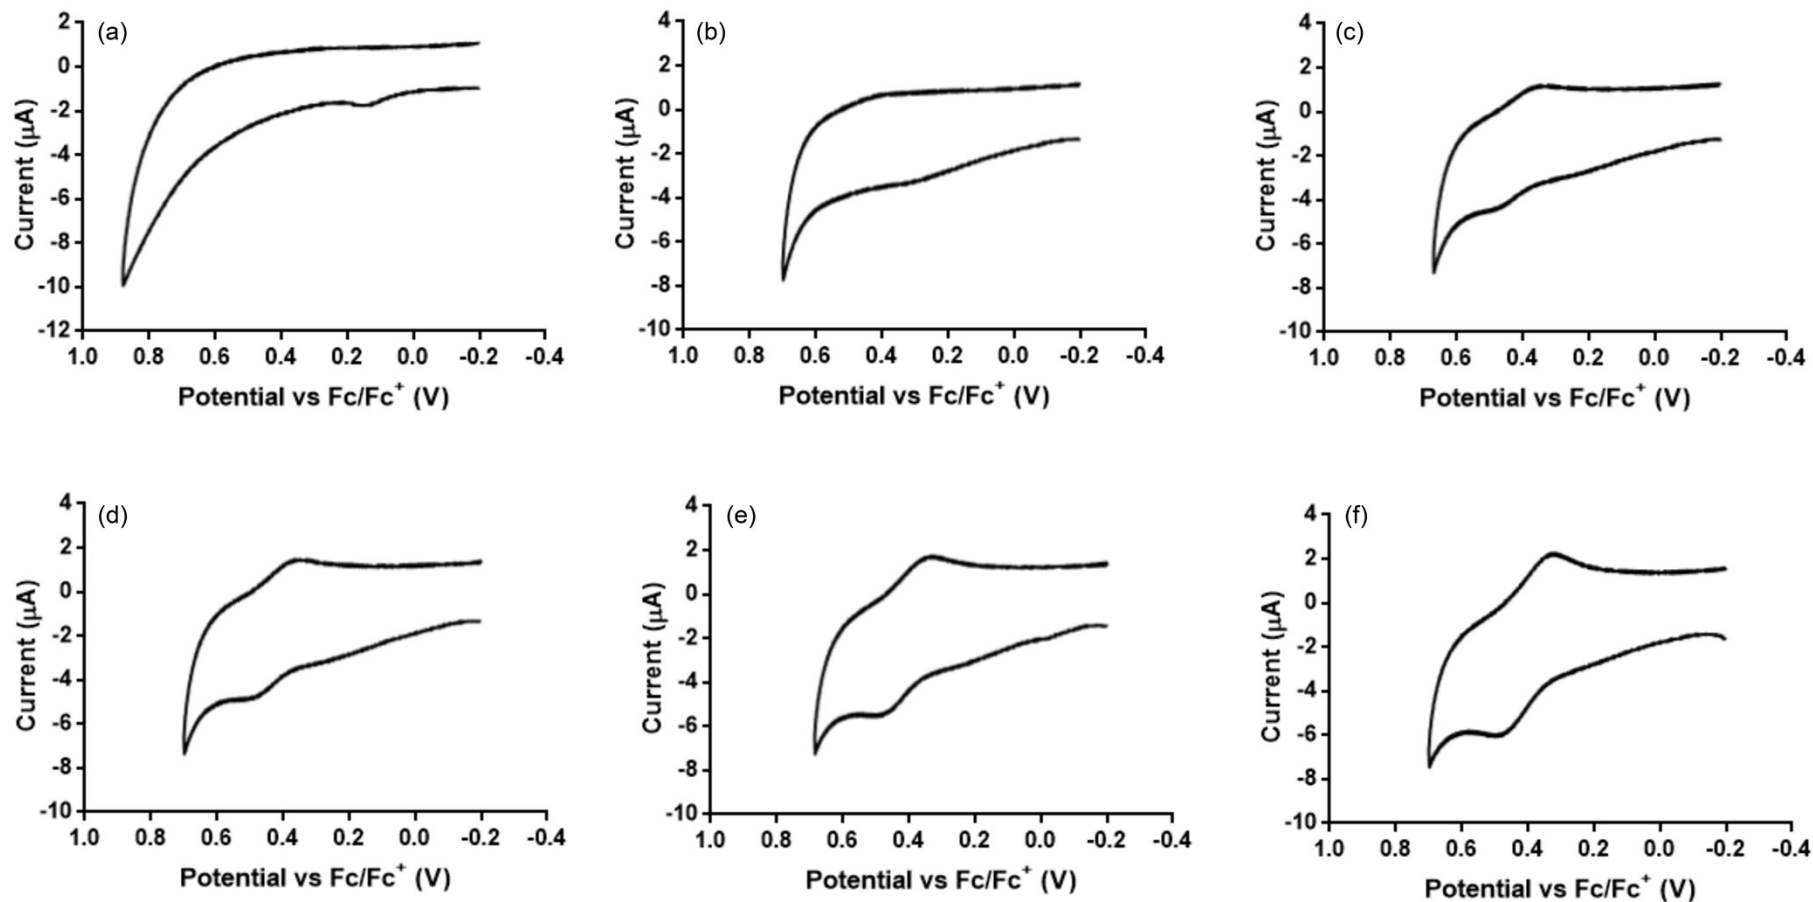

**Figure S5.** (a) Cyclic voltammetry of ascorbic acid where the measured oxidation peak is 0.15 V vs. Fc. (b)-(f) Ascorbic acid with diifrernt equivalents HCl from 0.05, 0.10, 0.15, 0.25, to 0.50. Cyclic voltammetry measurements were taken in  $10^{-4}$  M  $\text{CH}_3\text{OH}$  solutions using 0.1 M  $(\text{Bu}_4\text{N})(\text{PF}_6)$  as supporting electrolyte and referenced to  $\text{Fc}^{+/0}$ .

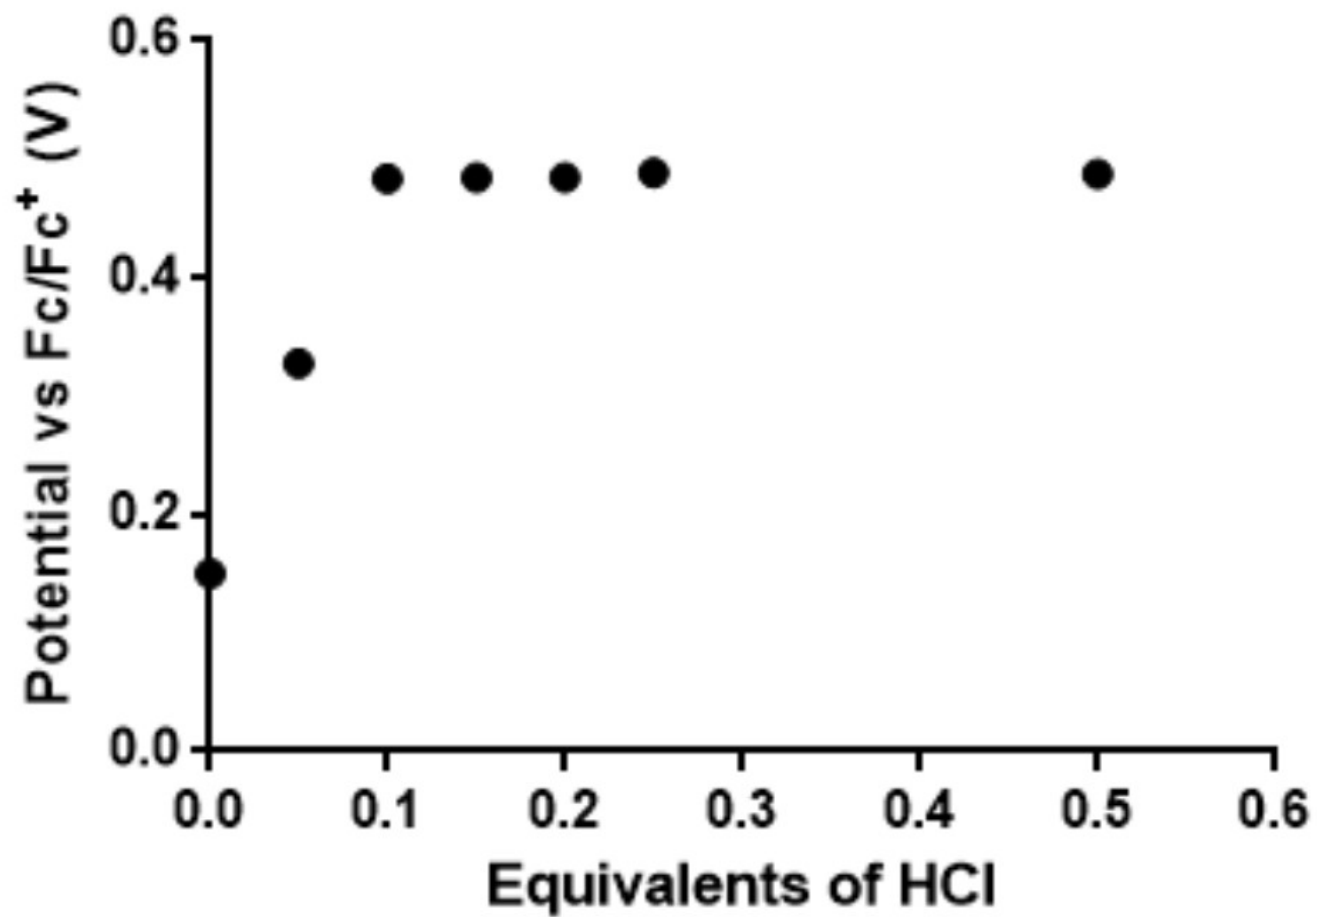

**Figure S6.** Oxidation peak of ascorbic acid with different equivalents HCl from 0.05, 0.10, 0.15, 0.25, to 0.50. Cyclic voltammetry measurements were taken in  $10^{-4}$  M CH<sub>3</sub>OH solutions using 0.1 M (Bu<sub>4</sub>N)(PF<sub>6</sub>) as supporting electrolyte and referenced to Fc<sup>+0</sup>.

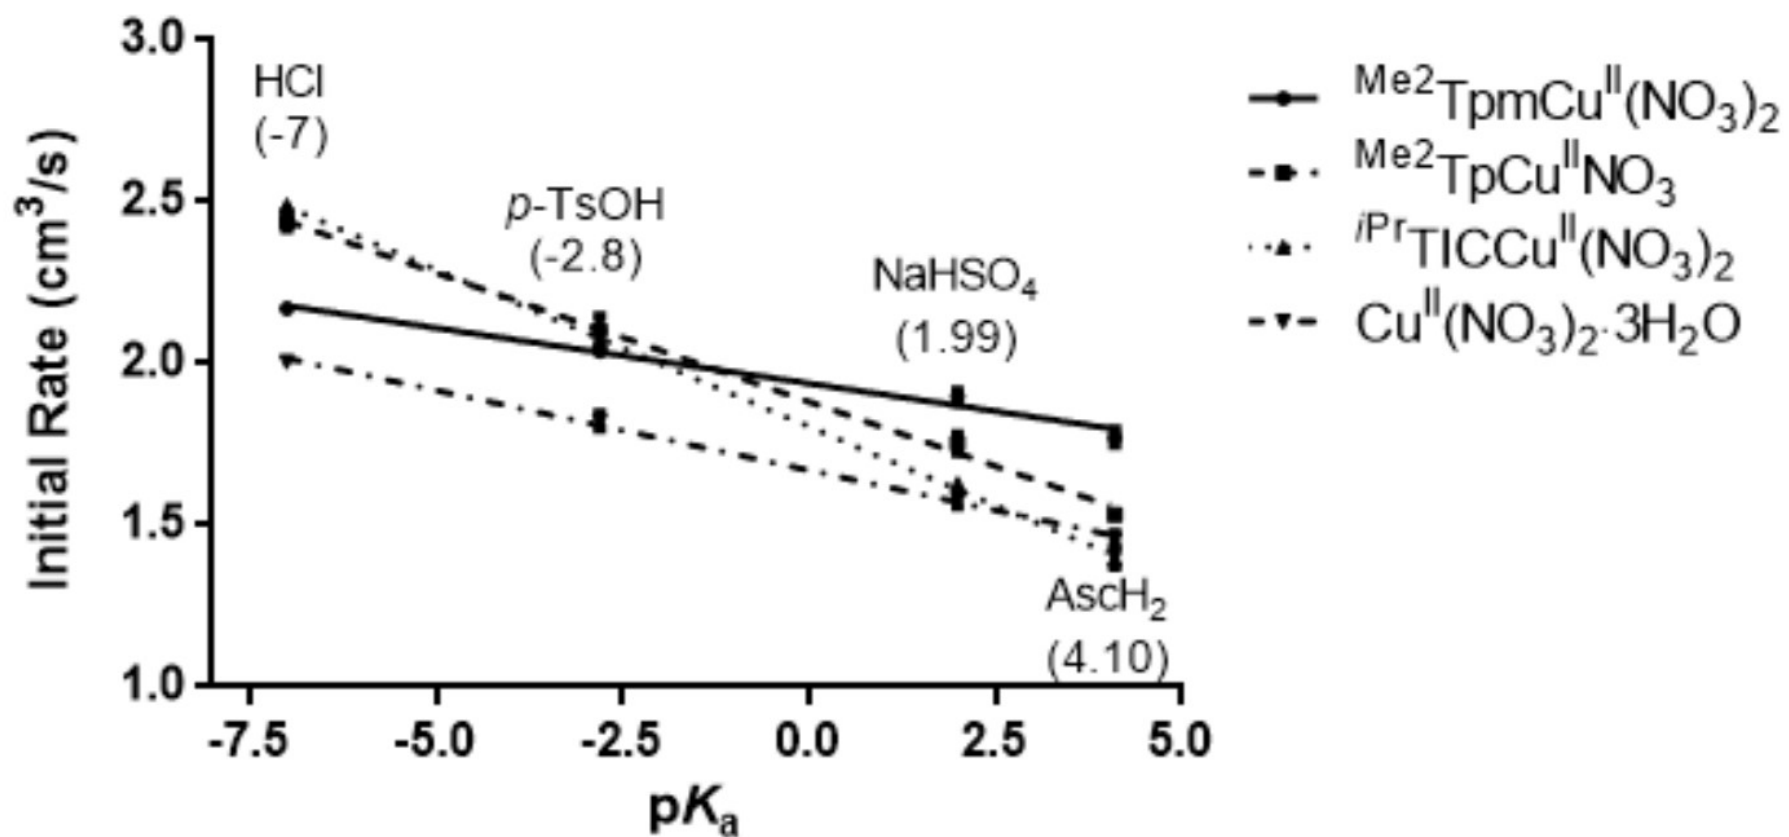

**Figure S7.** Initial rates with four different acids [(HCl, pK<sub>a</sub> ~ -7 in H<sub>2</sub>O), (*p*-TsOH, pK<sub>a</sub> ~ -2.8 in H<sub>2</sub>O), (NaHSO<sub>4</sub>, pK<sub>a</sub> ~ 1.99 in H<sub>2</sub>O), and (AsCH<sub>2</sub>, pK<sub>a1</sub> ~ 4.2 in H<sub>2</sub>O)] in catalytic cycles involving Me<sup>2</sup>TpmCu<sup>II</sup>(NO<sub>3</sub>)<sub>2</sub> (solid line), Me<sup>2</sup>TpCu<sup>II</sup>NO<sub>3</sub> (dash line), *i*PrTICCu<sup>II</sup>(NO<sub>3</sub>)<sub>2</sub> (dot line), and Cu<sup>II</sup>(NO<sub>3</sub>)<sub>2</sub>·3H<sub>2</sub>O (dash-dot line).

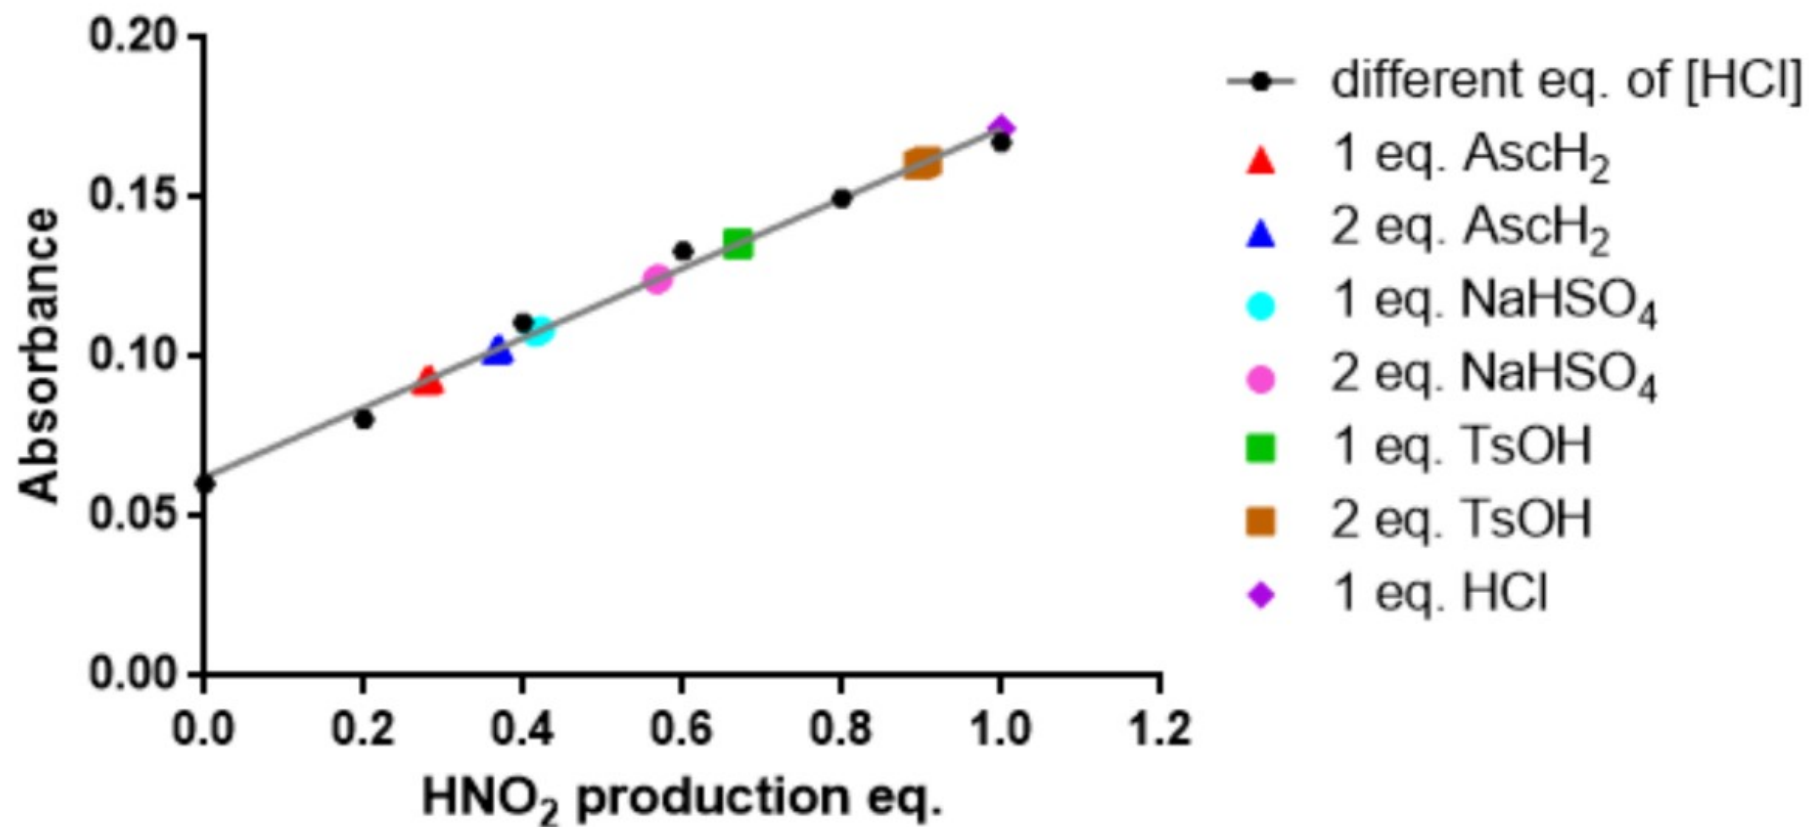

**Figure S8.** HNO<sub>2</sub> generation experiments of ascorbic acid as proton source. The HNO<sub>2</sub> amounts were performed by calibrating curve response with known equivalents of HCl mixed with nitrite anion (0.2, 0.4, 0.6, 0.8, and 1.0 of HCl).



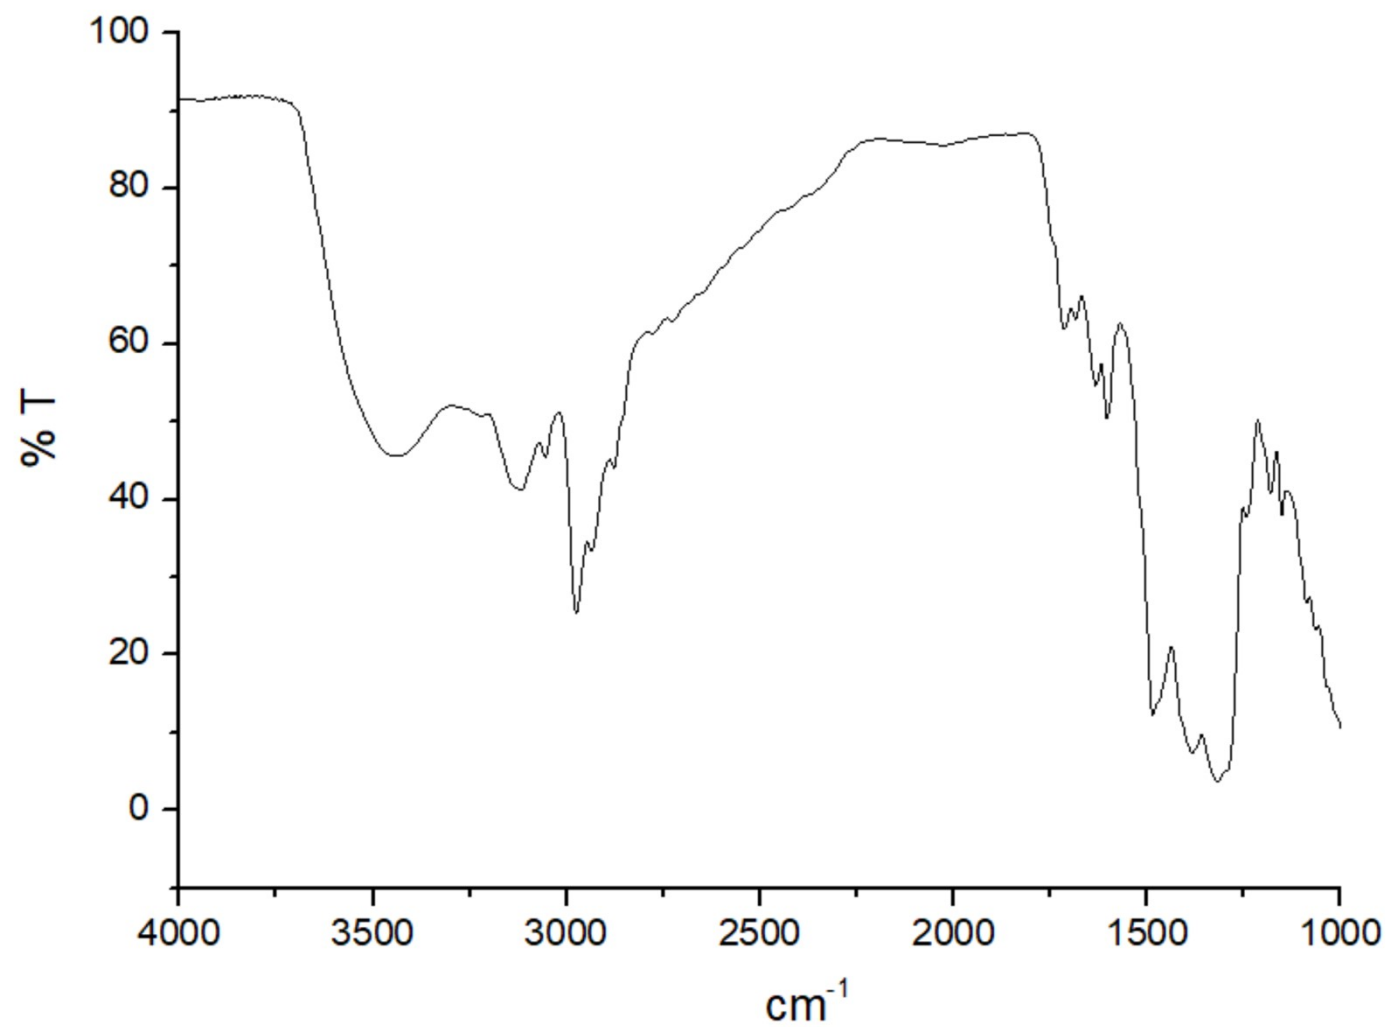

**Figure S9.** IR spectrum of  $iPrTICCu(NO_3)_2$  complex.

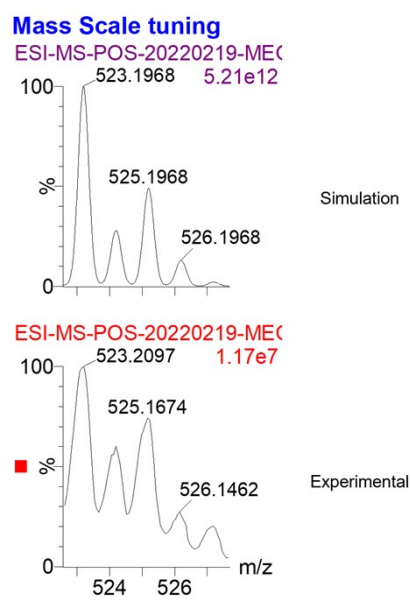

**Figure S10.** ESI-MS spectrum of  $i\text{PrTICCu}^{\text{II}}(\text{NO}_3)_2$ ;  $m/z = 523.2097$  ( $[i\text{PrTICCuNO}_3]^+$ )

**Table S1.** Experimental catalytic reduction of nitrite anions by  $\text{Cu}^{\text{II}}$  complexes with proton sources exhibiting different  $\text{pK}_a$ .<sup>[a]</sup>

| Entry | Acid <sup>[b]</sup>            | NO generation rate <sup>[c]</sup>                    |                                                 |                                              |                                                                  |
|-------|--------------------------------|------------------------------------------------------|-------------------------------------------------|----------------------------------------------|------------------------------------------------------------------|
|       |                                | $\text{Me}_2\text{TpmCu}^{\text{II}}(\text{NO}_3)_2$ | $\text{Me}_2\text{TpCu}^{\text{II}}\text{NO}_3$ | $i\text{PrTICCu}^{\text{II}}(\text{NO}_3)_2$ | $\text{Cu}^{\text{II}}(\text{NO}_3)_2 \cdot 3\text{H}_2\text{O}$ |
| 1     | hydrochloric acid              | 2.17±0.02                                            | 2.44±0.02                                       | 2.49±0.03                                    | 2.01±0.02                                                        |
| 2     | <i>p</i> -Toluenesulfonic acid | 2.04±0.01                                            | 2.10±0.05                                       | 2.07±0.03                                    | 1.82±0.03                                                        |
| 3     | Sodium hydrogen sulfate        | 1.90±0.02                                            | 1.75±0.03                                       | 1.63±0.02                                    | 1.58±0.02                                                        |
| 4     | Ascorbic acid                  | 1.77±0.03                                            | 1.53±0.02                                       | 1.40±0.03                                    | 1.46±0.02                                                        |

<sup>[a]</sup>General conditions: copper complex (0.04 mmol), sodium nitrite (4.09 mmol), and ascorbic acid (8.18 mmol) in 40 mL  $\text{CH}_3\text{OH}$ . <sup>[b]</sup>Ascorbic acid (4.09 mmol) with a second acid (4.09 mmol) <sup>[c]</sup>Initial  $\text{NO}_2^-$  conversion rate ( $\text{cm}^3 \text{s}^{-1}$ ).

Table S2. M06/6-31+G\* relative free energies (kcal/mol) of different binding modes

|                                                        | $\kappa^1-N$ | $\kappa^1-O$ | $\kappa^1-O(H)$ |
|--------------------------------------------------------|--------------|--------------|-----------------|
| Me <sup>2</sup> TpmCu <sup>I</sup> (HNO <sub>2</sub> ) | 0.0          | 4.9          | 5.2             |
| Me <sup>2</sup> TpCu <sup>I</sup> (HNO <sub>2</sub> )  | 0.0          | 5.9          | 6.1             |
| <i>i</i> PrTICCu <sup>I</sup> (HNO <sub>2</sub> )      | 0.0          | 0.7          | 2.3             |

## DFT optimized xyz coordinates

Me<sup>2</sup>TpmCu<sup>I</sup>(H<sub>2</sub>O)

|    |             |             |             |
|----|-------------|-------------|-------------|
| Cu | -2.09465600 | 13.93838500 | 3.92247500  |
| N  | -0.82331500 | 15.61123000 | 4.21842500  |
| N  | 0.49363200  | 15.31400800 | 4.03294400  |
| N  | -0.87820200 | 13.38967500 | 2.27635000  |
| N  | 0.45264000  | 13.41813500 | 2.57062800  |
| N  | -0.78907600 | 12.81466900 | 5.16979600  |
| N  | 0.52487200  | 13.10022200 | 4.94456800  |
| C  | -2.17944600 | 17.62143700 | 4.53793400  |
| C  | -0.88038400 | 16.93506100 | 4.32427000  |
| C  | 0.41008100  | 17.49475700 | 4.20095900  |
| C  | 1.27210000  | 16.43656400 | 4.00822700  |
| C  | 2.73929200  | 16.40346200 | 3.79508500  |
| C  | -2.28789800 | 12.64565000 | 0.42039900  |
| C  | -0.96702300 | 12.83597600 | 1.07118900  |
| C  | 0.31654000  | 12.50317600 | 0.58663200  |
| C  | 1.20884900  | 12.88160300 | 1.56658200  |
| C  | 2.68681000  | 12.77063000 | 1.62957800  |
| C  | -2.09679900 | 11.60014300 | 6.84371900  |
| C  | -0.81288300 | 12.10134600 | 6.29120600  |
| C  | 0.49499400  | 11.93391500 | 6.79677200  |
| C  | 1.33287300  | 12.59215500 | 5.92254400  |
| C  | 2.80229500  | 12.79247100 | 5.94838700  |
| C  | 0.91103400  | 13.94393500 | 3.83669100  |
| H  | 2.00487200  | 13.94523000 | 3.80358600  |
| H  | -2.99454600 | 16.88803000 | 4.59213600  |
| H  | 0.68121800  | 18.54407300 | 4.24763300  |
| H  | 3.24921900  | 15.77993400 | 4.54215900  |
| H  | -3.09318900 | 12.99792500 | 1.07797300  |
| H  | 0.56353900  | 12.04323300 | -0.36429100 |
| H  | 3.16568000  | 13.74677200 | 1.79015100  |
| H  | -2.94163000 | 11.96552700 | 6.24570300  |
| H  | 0.79225400  | 11.39790300 | 7.69183400  |
| H  | 3.06309600  | 13.85424500 | 6.06438200  |
| H  | -2.34735400 | 13.19951600 | -0.52572100 |
| H  | -2.46794300 | 11.58764800 | 0.18973000  |
| H  | 3.06267800  | 12.36276100 | 0.68549400  |
| H  | 3.00963700  | 12.10038700 | 2.43828800  |
| H  | -2.39735600 | 18.32144700 | 3.72081100  |
| H  | -2.17389900 | 18.20139100 | 5.47000100  |

|   |             |             |            |
|---|-------------|-------------|------------|
| H | -2.12555700 | 10.50241700 | 6.84778300 |
| H | -2.23794400 | 11.93255700 | 7.88013600 |
| H | 3.28657500  | 12.42608000 | 5.03276800 |
| H | 3.23016000  | 12.24737500 | 6.79618100 |
| H | 3.14343600  | 17.41827100 | 3.87098000 |
| H | 2.99572700  | 16.01110700 | 2.80090900 |
| O | -4.14149100 | 13.95411700 | 4.12651700 |
| H | -4.53920100 | 14.49408500 | 3.42340600 |
| H | -4.49043300 | 13.06038500 | 3.97354100 |

Me<sup>2</sup>TpmCu<sup>II</sup>(H<sub>2</sub>O)

|    |             |             |            |
|----|-------------|-------------|------------|
| Cu | -1.59570400 | 14.58483700 | 4.67074900 |
| N  | -0.32387500 | 16.28170500 | 4.84781400 |
| N  | 0.99022900  | 15.99810200 | 4.61554000 |
| N  | -0.45146900 | 13.91092400 | 3.02836600 |
| N  | 0.89248300  | 14.07729600 | 3.18760800 |
| N  | -0.32274800 | 13.64156100 | 5.81280000 |
| N  | 1.00185600  | 13.81112300 | 5.54554700 |
| C  | -1.69679400 | 18.28251200 | 5.21690100 |
| C  | -0.40089700 | 17.60481100 | 4.96359800 |
| C  | 0.87640800  | 18.17614600 | 4.80037500 |
| C  | 1.74885500  | 17.13155600 | 4.57628900 |
| C  | 3.21115600  | 17.12324600 | 4.33761700 |
| C  | -1.96715100 | 13.02488400 | 1.30864200 |
| C  | -0.61651800 | 13.34956500 | 1.83250200 |
| C  | 0.63637300  | 13.15550600 | 1.21858700 |
| C  | 1.58521700  | 13.62285400 | 2.10391100 |
| C  | 3.06261100  | 13.66768400 | 2.00918800 |
| C  | -1.71750800 | 12.45395600 | 7.44845800 |
| C  | -0.40775500 | 12.84424000 | 6.87614100 |
| C  | 0.88795500  | 12.49471300 | 7.29534000 |
| C  | 1.76827600  | 13.11954800 | 6.43551800 |
| C  | 3.24797600  | 13.11033500 | 6.39159500 |
| C  | 1.40474100  | 14.62764900 | 4.42240600 |
| H  | 2.49799300  | 14.61022100 | 4.36794600 |
| H  | -2.41005500 | 17.60418900 | 5.70009000 |
| H  | 1.13377000  | 19.22849700 | 4.84879000 |
| H  | 3.74878200  | 16.57266200 | 5.12130500 |
| H  | -2.69913900 | 12.94747100 | 2.12093900 |
| H  | 0.82675800  | 12.71639100 | 0.24546800 |
| H  | 3.44363300  | 14.69594600 | 2.06898900 |

|                                                                       |             |             |            |                                                                       |             |             |             |
|-----------------------------------------------------------------------|-------------|-------------|------------|-----------------------------------------------------------------------|-------------|-------------|-------------|
| H                                                                     | -2.54411500 | 12.81676400 | 6.82628500 | C                                                                     | -0.88831200 | 12.30615900 | 6.27910400  |
| H                                                                     | 1.15092600  | 11.85659800 | 8.13130800 | C                                                                     | 0.40086600  | 11.96279800 | 6.73652000  |
| H                                                                     | 3.66266400  | 14.11921800 | 6.51869600 | C                                                                     | 1.29264900  | 12.59279500 | 5.89444300  |
| H                                                                     | -2.31278800 | 13.79720400 | 0.60820600 | C                                                                     | 2.77490600  | 12.60590700 | 5.88347500  |
| H                                                                     | -1.95002100 | 12.07474200 | 0.76213100 | C                                                                     | 0.97508000  | 14.07915000 | 3.87281400  |
| H                                                                     | 3.37845000  | 13.24505900 | 1.05006700 | H                                                                     | 2.06889000  | 14.03286400 | 3.84842700  |
| H                                                                     | 3.53848400  | 13.08409500 | 2.80878100 | H                                                                     | -2.84369800 | 17.19751400 | 4.38266800  |
| H                                                                     | -2.14311100 | 18.63935400 | 4.27858700 | H                                                                     | 0.90403900  | 18.69142600 | 4.17467500  |
| H                                                                     | -1.55545200 | 19.15642700 | 5.86319400 | H                                                                     | 3.36525800  | 15.87968200 | 4.64016400  |
| H                                                                     | -1.79498400 | 11.36294400 | 7.52848200 | H                                                                     | -3.03894500 | 13.46555500 | 0.99744700  |
| H                                                                     | -1.83839000 | 12.86535400 | 8.45858500 | H                                                                     | 0.51838400  | 12.12048200 | -0.29587600 |
| H                                                                     | 3.62195200  | 12.70802500 | 5.44064200 | H                                                                     | 3.20072100  | 13.78223000 | 1.79020800  |
| H                                                                     | 3.63130900  | 12.48127600 | 7.20106000 | H                                                                     | -3.01967500 | 12.41071200 | 6.28512600  |
| H                                                                     | 3.58365800  | 18.15253600 | 4.33229400 | H                                                                     | 0.65168100  | 11.33056300 | 7.58129300  |
| H                                                                     | 3.46223100  | 16.66686500 | 3.37068600 | H                                                                     | 3.17338600  | 13.61872200 | 6.03317500  |
| O                                                                     | -3.03939300 | 15.34670500 | 3.58853600 | H                                                                     | -2.27714700 | 12.99196400 | -0.54121000 |
| H                                                                     | -3.37963600 | 16.17243200 | 3.97913600 | H                                                                     | -2.66245500 | 11.75970900 | 0.66726900  |
| H                                                                     | -2.71851400 | 15.60119600 | 2.70348200 | H                                                                     | 3.04372700  | 12.37395300 | 0.72172200  |
| $\kappa^1$ N bound $\text{Me}_2\text{TpmCu}^{\text{I}}(\text{HNO}_2)$ |             |             |            | H                                                                     | 3.00405500  | 12.15930800 | 2.48258500  |
| Cu                                                                    | -2.05192100 | 14.13216200 | 3.93103600 | H                                                                     | -2.12032000 | 18.62066100 | 3.59441400  |
| O                                                                     | -4.65830200 | 15.22917300 | 4.30244500 | H                                                                     | -2.01077000 | 18.43814800 | 5.34868700  |
| O                                                                     | -4.72515000 | 13.19374600 | 3.72680000 | H                                                                     | -2.35914000 | 10.81188500 | 6.70308100  |
| N                                                                     | -0.70439200 | 15.81535000 | 4.16937800 | H                                                                     | -2.29149700 | 12.12436800 | 7.88444200  |
| N                                                                     | 0.60661800  | 15.46572200 | 4.03458100 | H                                                                     | 3.18049100  | 12.22190300 | 4.93710000  |
| N                                                                     | -0.83959800 | 13.54442900 | 2.34340500 | H                                                                     | 3.15160100  | 11.97259800 | 6.69324800  |
| N                                                                     | 0.49475200  | 13.54253300 | 2.61793500 | H                                                                     | 3.32696500  | 17.47712100 | 3.87354200  |
| N                                                                     | -0.80030500 | 13.10189700 | 5.21737000 | H                                                                     | 3.17103600  | 16.01648300 | 2.87993500  |
| N                                                                     | 0.53221900  | 13.27312500 | 4.98770900 | H                                                                     | -4.08043100 | 12.48600300 | 3.50115500  |
| N                                                                     | -3.97408800 | 14.29775900 | 4.01479800 | $\kappa^1$ O bound $\text{Me}_2\text{TpmCu}^{\text{I}}(\text{HNO}_2)$ |             |             |             |
| C                                                                     | -1.98985900 | 17.88635800 | 4.39972100 | Cu                                                                    | -1.35823900 | -0.59469200 | -0.01558200 |
| C                                                                     | -0.71573700 | 17.14226700 | 4.24109800 | O                                                                     | -3.31683400 | -1.09552900 | -0.14625600 |
| C                                                                     | 0.59745100  | 17.65137600 | 4.14579900 | O                                                                     | -3.74526000 | 0.95847100  | -0.03575000 |
| C                                                                     | 1.42569700  | 16.55909800 | 4.00643800 | N                                                                     | 0.35123000  | -1.84840900 | -0.05680100 |
| C                                                                     | 2.89632900  | 16.47092500 | 3.84214000 | N                                                                     | 1.51459400  | -1.14442700 | 0.05734000  |
| C                                                                     | -2.30623600 | 12.79080900 | 0.53647900 | N                                                                     | -0.44927000 | 0.47763300  | 1.52881900  |
| C                                                                     | -0.96661300 | 12.97396600 | 1.14889500 | N                                                                     | 0.84208300  | 0.81887700  | 1.25629000  |
| C                                                                     | 0.29916700  | 12.60044800 | 0.65178200 | N                                                                     | -0.39679600 | 0.64918900  | -1.40890000 |
| C                                                                     | 1.21784900  | 12.96913600 | 1.61266200 | N                                                                     | 0.92209800  | 0.84704800  | -1.13369200 |
| C                                                                     | 2.69213800  | 12.81685800 | 1.65913100 | N                                                                     | -4.21801400 | -0.29884800 | -0.14857900 |
| C                                                                     | -2.20899400 | 11.89383000 | 6.81489800 | C                                                                     | -0.32483500 | -4.19650200 | -0.14050000 |

|                                                                          |             |             |             |   |             |             |             |
|--------------------------------------------------------------------------|-------------|-------------|-------------|---|-------------|-------------|-------------|
| C                                                                        | 0.70173900  | -3.12951800 | -0.03159600 | O | -4.11977600 | 15.56051700 | 2.58777800  |
| C                                                                        | 2.10205300  | -3.25333000 | 0.10116400  | O | -4.10425300 | 13.94145900 | 3.94974000  |
| C                                                                        | 2.59933500  | -1.96940000 | 0.15946900  | N | -0.79061300 | 15.61825300 | 4.28316800  |
| C                                                                        | 3.98720000  | -1.46960800 | 0.30943600  | N | 0.52335000  | 15.33888500 | 4.04851400  |
| C                                                                        | -2.14733900 | 1.04857900  | 3.19361100  | N | -0.82841000 | 13.48424900 | 2.24776800  |
| C                                                                        | -0.78714200 | 1.17146800  | 2.61070300  | N | 0.49825500  | 13.46309400 | 2.56263300  |
| C                                                                        | 0.29472500  | 1.97283600  | 3.03500100  | N | -0.75178500 | 12.79669700 | 5.12358300  |
| C                                                                        | 1.32185000  | 1.73810000  | 2.14591900  | N | 0.56089700  | 13.11338200 | 4.93050900  |
| C                                                                        | 2.68739900  | 2.31023700  | 2.06515400  | N | -4.84393500 | 14.84894200 | 3.18333700  |
| C                                                                        | -1.96798300 | 1.23142300  | -3.19197400 | C | -2.16749200 | 17.61603200 | 4.60901200  |
| C                                                                        | -0.61362200 | 1.23470100  | -2.58238700 | C | -0.86627100 | 16.94299800 | 4.36472400  |
| C                                                                        | 0.57924700  | 1.80999000  | -3.06912600 | C | 0.40776000  | 17.52094400 | 4.17714800  |
| C                                                                        | 1.54997100  | 1.54376900  | -2.12603200 | C | 1.27960200  | 16.47380300 | 3.96798000  |
| C                                                                        | 2.99495200  | 1.87397200  | -2.09866200 | C | 2.73691500  | 16.46261800 | 3.69390900  |
| C                                                                        | 1.49845300  | 0.30076100  | 0.07600800  | C | -2.24690300 | 12.71811700 | 0.40751300  |
| H                                                                        | 2.53955400  | 0.63629100  | 0.11417900  | C | -0.92784200 | 12.87561500 | 1.06991300  |
| H                                                                        | -1.33256000 | -3.76085200 | -0.15206200 | C | 0.34365800  | 12.45363600 | 0.62591200  |
| H                                                                        | 2.68087400  | -4.16942700 | 0.14958800  | C | 1.23863400  | 12.83109600 | 1.60394400  |
| H                                                                        | 4.28809500  | -0.83439500 | -0.53528000 | C | 2.70331400  | 12.62559300 | 1.70824500  |
| H                                                                        | -2.69337800 | 0.22013200  | 2.72380600  | C | -2.07239900 | 11.53777800 | 6.75346000  |
| H                                                                        | 0.32460500  | 2.64169800  | 3.88843500  | C | -0.78626300 | 12.06763600 | 6.23484200  |
| H                                                                        | 3.46422100  | 1.53547900  | 2.11890900  | C | 0.51330700  | 11.91907100 | 6.76510600  |
| H                                                                        | -2.56127700 | 0.38839100  | -2.81505500 | C | 1.35657300  | 12.60608600 | 5.91822600  |
| H                                                                        | 0.71824500  | 2.35067400  | -3.99919800 | C | 2.82088900  | 12.83298800 | 5.97805600  |
| H                                                                        | 3.61799600  | 0.96915300  | -2.06844200 | C | 0.95199800  | 13.97477300 | 3.83674700  |
| H                                                                        | -2.10001600 | 0.86674700  | 4.27474000  | H | 2.04636900  | 13.98139000 | 3.80887500  |
| H                                                                        | -2.72596200 | 1.96998500  | 3.04224300  | H | -2.91046800 | 16.89830700 | 4.97988000  |
| H                                                                        | 2.84384000  | 3.00106000  | 2.90019900  | H | 0.66259100  | 18.57516500 | 4.19758500  |
| H                                                                        | 2.83473200  | 2.87128300  | 1.13168100  | H | 3.28848300  | 15.84298200 | 4.41427200  |
| H                                                                        | -0.25918500 | -4.89871700 | 0.70027200  | H | -3.04897000 | 13.09404500 | 1.05580700  |
| H                                                                        | -0.19189300 | -4.77943700 | -1.06148500 | H | 0.58140000  | 11.93535100 | -0.29695000 |
| H                                                                        | -2.51069900 | 2.15788500  | -2.95796400 | H | 3.24574000  | 13.56824000 | 1.86446400  |
| H                                                                        | -1.90622700 | 1.15448800  | -4.28405400 | H | -2.90667500 | 11.86695900 | 6.12026000  |
| H                                                                        | 3.25970900  | 2.49356600  | -1.23075600 | H | 0.80222300  | 11.37554800 | 7.65828100  |
| H                                                                        | 3.25819800  | 2.43317300  | -3.00258500 | H | 3.05683900  | 13.89560000 | 6.13028400  |
| H                                                                        | 4.67936100  | -2.31671100 | 0.35596700  | H | -2.28368600 | 13.26970700 | -0.54114900 |
| H                                                                        | 4.10894600  | -0.88265600 | 1.23046200  | H | -2.45077800 | 11.66408100 | 0.17903600  |
| H                                                                        | -4.54017700 | 1.53660300  | -0.04638800 | H | 3.07462500  | 12.17349300 | 0.78263400  |
|                                                                          |             |             |             | H | 2.95764300  | 11.94977100 | 2.53662100  |
| $\kappa^1$ O(H) bound $\text{Me}_2\text{TpmCu}^{\text{I}}(\text{HNO}_2)$ |             |             |             | H | -2.55824200 | 18.06872200 | 3.68739600  |
| Cu                                                                       | -2.03538700 | 13.93235500 | 3.92548000  | H | -2.06242800 | 18.42090200 | 5.34708900  |

|   |             |             |            |
|---|-------------|-------------|------------|
| H | -2.06862100 | 10.44009100 | 6.77700300 |
| H | -2.25754000 | 11.88448600 | 7.77828000 |
| H | 3.32890900  | 12.50300200 | 5.06159100 |
| H | 3.24333900  | 12.27192600 | 6.81806300 |
| H | 3.12872200  | 17.48311300 | 3.75711500 |
| H | 2.95406800  | 16.08000800 | 2.68677100 |
| H | -4.75337500 | 13.36767000 | 4.41171300 |

Me<sup>2</sup>TpCu<sup>I</sup>(H<sub>2</sub>O)

|    |             |             |             |
|----|-------------|-------------|-------------|
| Cu | -1.89205300 | 13.95517800 | 3.96036100  |
| O  | -3.98139000 | 13.76336300 | 4.06166400  |
| N  | -0.75584300 | 15.70189000 | 4.06504500  |
| N  | 0.58571600  | 15.44697400 | 4.02570300  |
| N  | -0.76960800 | 13.23263400 | 2.34257800  |
| N  | 0.57295800  | 13.38906900 | 2.53217400  |
| N  | -0.66890600 | 12.97993400 | 5.34206000  |
| N  | 0.65835300  | 13.12259300 | 5.05875000  |
| C  | -2.25682700 | 17.62851100 | 4.30216700  |
| C  | -0.90316500 | 17.01693300 | 4.22309900  |
| C  | 0.35999900  | 17.63324300 | 4.28795400  |
| C  | 1.28079200  | 16.60438500 | 4.15969600  |
| C  | 2.76652500  | 16.67427900 | 4.16152500  |
| C  | -2.30096700 | 12.41475000 | 0.60899700  |
| C  | -0.93662600 | 12.70485400 | 1.13020200  |
| C  | 0.31337300  | 12.51156300 | 0.51758500  |
| C  | 1.25030000  | 12.95960600 | 1.43919000  |
| C  | 2.73296600  | 12.99543600 | 1.32464100  |
| C  | -2.09490100 | 11.79407300 | 6.94396500  |
| C  | -0.76283400 | 12.17107600 | 6.39659400  |
| C  | 0.52180600  | 11.77969400 | 6.81262600  |
| C  | 1.40016300  | 12.40390500 | 5.93718500  |
| C  | 2.88624100  | 12.35042100 | 5.90459200  |
| B  | 1.11099600  | 13.99580300 | 3.85700100  |
| H  | 2.31031100  | 14.01613900 | 3.81790800  |
| H  | -3.02939300 | 16.84745600 | 4.28581500  |
| H  | 0.57949700  | 18.68914200 | 4.41336900  |
| H  | 3.20590900  | 16.07642200 | 4.97181600  |
| H  | -2.87584800 | 13.33898200 | 0.45295000  |
| H  | 0.51382200  | 12.09928400 | -0.46678900 |
| H  | 3.12734500  | 14.01742500 | 1.40865800  |
| H  | -2.77351100 | 12.65813000 | 6.96209500  |

|   |             |             |             |
|---|-------------|-------------|-------------|
| H | 0.78262700  | 11.13146700 | 7.64377300  |
| H | 3.33708500  | 13.34370700 | 6.03633300  |
| H | -2.25097200 | 11.88664500 | -0.35058800 |
| H | -2.87221600 | 11.79026000 | 1.31022400  |
| H | 3.03764900  | 12.59721700 | 0.34961800  |
| H | 3.22168800  | 12.39214300 | 2.10180500  |
| H | -2.44343000 | 18.30907200 | 3.46006600  |
| H | -2.38188000 | 18.21320200 | 5.22335800  |
| H | -2.57337200 | 11.01425100 | 6.33346100  |
| H | -2.00838400 | 11.40541700 | 7.96583600  |
| H | 3.26249600  | 11.94458200 | 4.95550100  |
| H | 3.25063700  | 11.70623000 | 6.71345700  |
| H | 3.08660000  | 17.71385200 | 4.29893500  |
| H | 3.19747900  | 16.31186000 | 3.21810900  |
| H | -4.18135600 | 12.82958600 | 4.23997800  |
| H | -4.34279500 | 13.92213200 | 3.17410100  |

Me<sup>2</sup>TpCu<sup>II</sup>(H<sub>2</sub>O)

|    |             |             |            |
|----|-------------|-------------|------------|
| Cu | -1.88893400 | 14.40699100 | 3.92511500 |
| O  | -3.37510500 | 13.09819300 | 3.76609600 |
| N  | -0.61855900 | 15.86319600 | 4.06072900 |
| N  | 0.70266000  | 15.54613200 | 4.01373400 |
| N  | -0.82028200 | 13.64546600 | 2.28671800 |
| N  | 0.52046600  | 13.53514700 | 2.52306000 |
| N  | -0.78984700 | 13.30859200 | 5.32089900 |
| N  | 0.54766400  | 13.26478000 | 5.05051900 |
| C  | -2.06561300 | 17.84892400 | 4.23924200 |
| C  | -0.73658700 | 17.18930100 | 4.17229700 |
| C  | 0.54839200  | 17.74767500 | 4.20152400 |
| C  | 1.43232800  | 16.68085900 | 4.09798600 |
| C  | 2.91721600  | 16.68615200 | 4.07693300 |
| C  | -2.43368000 | 13.08227300 | 0.50978700 |
| C  | -1.06043300 | 13.13342400 | 1.07791300 |
| C  | 0.14373000  | 12.68060400 | 0.51748400 |
| C  | 1.12458500  | 12.95220700 | 1.46115300 |
| C  | 2.58673000  | 12.69453200 | 1.39546600 |
| C  | -2.37244900 | 12.38843500 | 6.96906900 |
| C  | -1.00759000 | 12.56486300 | 6.40737000 |
| C  | 0.20874600  | 12.02526900 | 6.85164700 |
| C  | 1.17295300  | 12.49128500 | 5.96852200 |
| C  | 2.63793600  | 12.24263700 | 5.96381700 |

B 1.12324700 14.06083400 3.85164400  
 H 2.31601100 13.96846100 3.82946000  
 H -2.87502500 17.10806700 4.21130500  
 H 0.80536500 18.79812600 4.28750500  
 H 3.33701800 16.09231300 4.89977400  
 H -3.03829900 13.93245500 0.85130900  
 H 0.28593200 12.22031900 -0.45504200  
 H 3.16818000 13.62300000 1.47446200  
 H -2.99231400 13.27645700 6.78971300  
 H 0.37031900 11.38351700 7.71176200  
 H 3.21068600 13.17481900 6.06012500  
 H -2.40149500 13.10476600 -0.58606400  
 H -2.95394800 12.15928400 0.80199000  
 H 2.83466300 12.22034300 0.43907800  
 H 2.92189200 12.02683300 2.20021600  
 H -2.20636900 18.53876100 3.39712500  
 H -2.17093700 18.43506300 5.16105400  
 H -2.88213500 11.52418900 6.52050800  
 H -2.32919400 12.21483100 8.05085200  
 H 2.96663000 11.74789700 5.04030200  
 H 2.90321900 11.59405900 6.80640400  
 H 3.28446600 17.71353100 4.17729200  
 H 3.31174800 16.27437500 3.13827500  
 H -3.98461900 13.33813800 3.04568200  
 H -3.92135000 13.08996100 4.57216700

$\kappa^1$  N bound  $\text{Me}_2\text{TpCu}^{\text{I}}(\text{HNO}_2)$

Cu -1.92746000 14.06225500 3.94647200  
 O -4.47928700 14.61638100 5.04663400  
 O -4.64728700 13.81449600 3.09240500  
 N -0.73234900 15.72390700 4.03108500  
 N 0.60550700 15.46158700 3.98316500  
 N -0.78290100 13.29973100 2.29906500  
 N 0.56306800 13.39699300 2.51001200  
 N -0.73848300 13.02625800 5.25571900  
 N 0.60059500 13.15861300 5.03174800  
 N -3.85403000 14.11663600 3.93155700  
 C -2.22703700 17.65787200 4.27872600  
 C -0.87748000 17.04284200 4.16507600  
 C 0.38714400 17.65276800 4.20051000  
 C 1.30446100 16.61711300 4.08273300

C 2.78976000 16.67760400 4.05591600  
 C -2.31479900 12.48477000 0.56005700  
 C -0.95335300 12.73728000 1.10272700  
 C 0.29835900 12.46276400 0.52250500  
 C 1.23770300 12.89523700 1.44606600  
 C 2.72203600 12.85318600 1.36466600  
 C -2.24255200 11.96035700 6.87881300  
 C -0.88956800 12.26833800 6.34272700  
 C 0.37244200 11.89440700 6.83331000  
 C 1.29445100 12.47934500 5.97568200  
 C 2.77967400 12.41735500 6.00953600  
 B 1.10618900 13.99990400 3.82898200  
 H 2.30511600 13.99100300 3.81233800  
 H -2.96463100 17.10340800 3.68294500  
 H 0.60952700 18.71094000 4.29642800  
 H 3.23871800 16.09752700 4.87368500  
 H -3.08052200 12.82897600 1.26784300  
 H 0.49720900 12.00853500 -0.44336800  
 H 3.16579100 13.85625100 1.42604000  
 H -2.57332800 12.72507800 7.59642600  
 H 0.59012100 11.27715800 7.69937300  
 H 3.22963200 13.41429400 6.11227300  
 H -2.47081300 13.00830300 -0.39290900  
 H -2.48093000 11.41549300 0.37110500  
 H 3.02740700 12.40719900 0.41092200  
 H 3.16054600 12.25250200 2.17335100  
 H -2.21598900 18.69780500 3.93046800  
 H -2.57926000 17.66456800 5.32035600  
 H -2.98529600 11.92041300 6.07066000  
 H -2.25158800 10.99693300 7.40280400  
 H 3.19198400 11.96425900 5.09752000  
 H 3.10477700 11.81166600 6.86338000  
 H 3.11917700 17.71793300 4.15972700  
 H 3.19923200 16.28664700 3.11439000  
 H -3.75498900 14.83452100 5.67520700

$\kappa^1$  O bound  $\text{Me}_2\text{TpCu}^{\text{I}}(\text{HNO}_2)$

Cu -1.85934400 13.97063000 3.90790800  
 O -3.86119400 13.88702100 3.65937600  
 O -4.02883500 14.72466400 5.57937600  
 N -0.71710300 15.68217000 4.00306700



|   |             |             |             |                                              |             |             |             |
|---|-------------|-------------|-------------|----------------------------------------------|-------------|-------------|-------------|
| N | 0.62411800  | 15.43063700 | 3.97591000  | H                                            | 3.19091400  | 11.77836500 | 6.81931000  |
| N | -0.71824300 | 13.22327900 | 2.29035600  | H                                            | 3.11613100  | 17.71051400 | 4.19138800  |
| N | 0.62300900  | 13.35960300 | 2.50179800  | H                                            | 3.22819800  | 16.28444000 | 3.14257300  |
| N | -0.68425300 | 12.96859500 | 5.26523800  | H                                            | -4.74490100 | 15.00420600 | 6.19079300  |
| N | 0.65188500  | 13.12286000 | 5.03069600  |                                              |             |             |             |
| N | -4.66228700 | 14.26011300 | 4.47721500  |                                              |             |             |             |
| C | -2.23071200 | 17.60336800 | 4.20241300  | $\kappa^1$ O(H) bound $^{Me_2}TpCu^I(HNO_2)$ |             |             |             |
| C | -0.87315400 | 16.99998900 | 4.12600100  | Cu                                           | -1.87640200 | 14.00109800 | 3.96748900  |
| C | 0.38670800  | 17.62168100 | 4.17846600  | O                                            | -4.10654600 | 15.07139200 | 2.36276300  |
| C | 1.31319100  | 16.59320500 | 4.08049700  | O                                            | -3.95257000 | 13.97673900 | 4.16380800  |
| C | 2.79837400  | 16.66740200 | 4.07832800  | N                                            | -0.72442100 | 15.72739900 | 4.06554700  |
| C | -2.23724600 | 12.38665200 | 0.56019000  | N                                            | 0.61206300  | 15.45087900 | 4.02950600  |
| C | -0.87430600 | 12.66721700 | 1.09020600  | N                                            | -0.79661000 | 13.26379800 | 2.35669000  |
| C | 0.38278500  | 12.43545900 | 0.50571200  | N                                            | 0.55001600  | 13.38904700 | 2.54753400  |
| C | 1.31157000  | 12.88894100 | 1.43313500  | N                                            | -0.70058200 | 13.00737600 | 5.35041300  |
| C | 2.79649600  | 12.89320600 | 1.34794400  | N                                            | 0.63081200  | 13.13077500 | 5.07727100  |
| C | -2.15642700 | 11.84110100 | 6.87363800  | N                                            | -4.76796900 | 14.58077300 | 3.20783500  |
| C | -0.81258200 | 12.18888000 | 6.33855600  | C                                            | -2.20092400 | 17.67635400 | 4.23889600  |
| C | 0.45970800  | 11.82475500 | 6.81284900  | C                                            | -0.85321100 | 17.04717500 | 4.19414400  |
| C | 1.36472400  | 12.43676500 | 5.95712100  | C                                            | 0.41830600  | 17.64501400 | 4.24698100  |
| C | 2.85114800  | 12.39495700 | 5.97897100  | C                                            | 1.32447300  | 16.59933400 | 4.13954900  |
| B | 1.14412800  | 13.97462100 | 3.82851900  | C                                            | 2.81095800  | 16.64460500 | 4.14427500  |
| H | 2.34360800  | 13.98464400 | 3.81697600  | C                                            | -2.34817900 | 12.49999700 | 0.61602800  |
| H | -2.97493200 | 16.93960400 | 3.74155000  | C                                            | -0.97836800 | 12.74540800 | 1.14273500  |
| H | 0.60026800  | 18.68204700 | 4.27144500  | C                                            | 0.26784800  | 12.52450200 | 0.52954600  |
| H | 3.23968200  | 16.08883200 | 4.90136900  | C                                            | 1.21487500  | 12.94655800 | 1.45155400  |
| H | -2.80837000 | 11.74685900 | 1.24769900  | C                                            | 2.69787800  | 12.94380700 | 1.33889800  |
| H | 0.59344100  | 11.99513100 | -0.46425300 | C                                            | -2.15981400 | 11.88388900 | 6.96400000  |
| H | 3.20937100  | 13.90903800 | 1.41512900  | C                                            | -0.81598900 | 12.21693000 | 6.41623400  |
| H | -2.46002500 | 12.52612400 | 7.67823500  | C                                            | 0.45921100  | 11.81549100 | 6.84930900  |
| H | 0.69470000  | 11.19589100 | 7.66609700  | C                                            | 1.35434700  | 12.41597000 | 5.97332900  |
| H | 3.28829900  | 13.39596900 | 6.09700200  | C                                            | 2.83967600  | 12.34216000 | 5.95373300  |
| H | -2.81328100 | 13.31337900 | 0.42690400  | B                                            | 1.10549900  | 13.98637200 | 3.87007000  |
| H | -2.18570500 | 11.87959700 | -0.41051800 | H                                            | 2.30461100  | 13.97858600 | 3.83092500  |
| H | 3.11286500  | 12.46444500 | 0.38981300  | H                                            | -2.93763900 | 16.98613300 | 4.67281000  |
| H | 3.25659100  | 12.30029700 | 2.15030200  | H                                            | 0.65273300  | 18.69980600 | 4.35317300  |
| H | -2.26542600 | 18.57084700 | 3.68593500  | H                                            | 3.23771500  | 16.04900600 | 4.96292500  |
| H | -2.53779700 | 17.77789000 | 5.24354900  | H                                            | -3.07054700 | 12.41840300 | 1.43972800  |
| H | -2.91631000 | 11.89957900 | 6.08218300  | H                                            | 0.45938300  | 12.10893800 | -0.45509900 |
| H | -2.16783800 | 10.82524700 | 7.28807700  | H                                            | 3.11829000  | 13.95532600 | 1.42257700  |
| H | 3.26391400  | 11.96485200 | 5.05603400  | H                                            | -2.72719400 | 12.79399600 | 7.20512300  |
|   |             |             |             | H                                            | 0.70360300  | 11.17436800 | 7.69082300  |

|                                                      |             |             |             |   |             |            |             |
|------------------------------------------------------|-------------|-------------|-------------|---|-------------|------------|-------------|
| H                                                    | 3.30232000  | 13.33049800 | 6.08182000  | C | 5.54936700  | 6.86357200 | 2.06094600  |
| H                                                    | -2.68059800 | 13.31743800 | -0.03989500 | C | 4.20955700  | 7.02752300 | -0.06442400 |
| H                                                    | -2.38984900 | 11.57420300 | 0.02817500  | C | 5.67320400  | 8.33481900 | 2.29690200  |
| H                                                    | 2.99387300  | 12.53632700 | 0.36510700  | C | 5.44889300  | 8.68259700 | 3.76349500  |
| H                                                    | 3.16863400  | 12.32937400 | 2.11851300  | C | 7.03686800  | 8.82893500 | 1.81347500  |
| H                                                    | -2.55252500 | 17.94651800 | 3.23265300  | H | 4.16699900  | 1.68636900 | 4.33540400  |
| H                                                    | -2.19286500 | 18.59467700 | 4.83905600  | H | 3.18406500  | 1.42747500 | 6.53809200  |
| H                                                    | -2.75574700 | 11.30973600 | 6.24001100  | H | 4.36113700  | 1.65543100 | 7.85313800  |
| H                                                    | -2.07547000 | 11.28584900 | 7.87904500  | H | 3.12923300  | 2.90907600 | 7.52094700  |
| H                                                    | 3.21806500  | 11.92434600 | 5.01067300  | H | 5.31991100  | 3.79924300 | 8.44229200  |
| H                                                    | 3.18853700  | 11.69958600 | 6.77063700  | H | 7.77831900  | 3.79167600 | 7.99340900  |
| H                                                    | 3.14831400  | 17.68014000 | 4.27000500  | H | 7.65200800  | 5.39825000 | 7.24848500  |
| H                                                    | 3.23784800  | 16.26374300 | 3.20632100  | H | 7.29919800  | 5.19174900 | 8.97864700  |
| H                                                    | -4.55155900 | 13.58758800 | 4.83736100  | H | 5.01173400  | 6.25867200 | 8.68550900  |
| <sup>i</sup> PrTICCu <sup>+</sup> (H <sub>2</sub> O) |             |             |             | H | 5.29586500  | 6.47735500 | 6.94310400  |
| Cu                                                   | 7.41944300  | 5.69081900  | 4.48224400  | H | 3.85769600  | 5.59722700 | 7.50469100  |
| O                                                    | 5.62955200  | 2.38608400  | 2.03170900  | H | 8.26892600  | 1.47262400 | 1.59815100  |
| N                                                    | 6.20680900  | 4.13121500  | 5.23626000  | H | 11.63294600 | 1.77639900 | 2.81537600  |
| N                                                    | 4.68630600  | 2.79448500  | 6.10828100  | H | 10.66486800 | 1.08910000 | 1.49115000  |
| N                                                    | 8.52374400  | 4.26688800  | 3.35230100  | H | 11.55378400 | 2.61023100 | 1.23445000  |
| N                                                    | 9.80745400  | 2.74345300  | 2.40835500  | H | 11.85388100 | 4.24273700 | 3.03125700  |
| N                                                    | 6.07584600  | 5.91394300  | 2.82104100  | H | 11.80169400 | 6.62522300 | 3.68526700  |
| N                                                    | 4.91159300  | 6.31799100  | 0.99244500  | H | 10.71277400 | 6.35284500 | 2.30498900  |
| C                                                    | 6.21247200  | 3.40797100  | 2.81950700  | H | 10.04540300 | 6.54390600 | 3.94133700  |
| C                                                    | 5.72546700  | 3.30277100  | 4.24768400  | H | 11.34829300 | 3.23635100 | 5.26340900  |
| C                                                    | 4.77830900  | 2.46820400  | 4.77038400  | H | 12.14025600 | 4.81913200 | 5.43910700  |
| C                                                    | 5.56542900  | 3.80229400  | 6.34807600  | H | 10.38560700 | 4.66943300 | 5.69280700  |
| C                                                    | 3.79314100  | 2.16511400  | 7.06724700  | H | 4.60037000  | 4.28641700 | 0.34504300  |
| C                                                    | 5.72876100  | 4.47332900  | 7.67409900  | H | 3.34123800  | 7.56221800 | 0.33615200  |
| C                                                    | 7.19838300  | 4.72462500  | 7.98986800  | H | 4.87846200  | 7.73848900 | -0.56140600 |
| C                                                    | 4.92396300  | 5.77374800  | 7.70370900  | H | 3.86393100  | 6.29601500 | -0.79959800 |
| C                                                    | 7.72207600  | 3.31585800  | 2.76198400  | H | 4.89522200  | 8.83602000 | 1.70119500  |
| C                                                    | 8.50246400  | 2.36367000  | 2.16918700  | H | 6.21452100  | 8.21354200 | 4.39851800  |
| C                                                    | 9.77559900  | 3.89987300  | 3.12084600  | H | 5.50647200  | 9.76965900 | 3.90869200  |
| C                                                    | 10.98806300 | 2.02035600  | 1.96406400  | H | 4.46559900  | 8.34266400 | 4.11643200  |
| C                                                    | 10.99363400 | 4.61935700  | 3.60480500  | H | 7.84729300  | 8.34645700 | 2.38133200  |
| C                                                    | 10.88031000 | 6.12033800  | 3.36545800  | H | 7.19585900  | 8.60819000 | 0.74861800  |
| C                                                    | 11.23139000 | 4.31443000  | 5.08412300  | H | 7.12486100  | 9.91507700 | 1.95252700  |
| C                                                    | 5.75851400  | 4.71672000  | 2.22107900  | H | 5.87353100  | 1.52269300 | 2.40678800  |
| C                                                    | 5.03706000  | 4.94643000  | 1.08472000  | O | 8.27209700  | 7.24466300 | 5.62459000  |
|                                                      |             |             |             | H | 7.61390900  | 7.62111200 | 6.23225100  |

H 8.51382000 7.98441200 5.04260000

<sup>iPr</sup>TICCu<sup>II</sup>(H<sub>2</sub>O)

Cu 7.43528300 5.73044100 4.30974500

O 5.64368900 2.28808000 2.08426400

N 6.05713200 4.28441200 5.16397100

N 4.71022600 2.85863700 6.15891400

N 8.51328900 4.28581800 3.25349100

N 9.83569400 2.77947000 2.36322600

N 6.22216000 5.81151200 2.78699100

N 4.94393500 6.28593600 1.08283600

C 6.22841700 3.31890700 2.84434600

C 5.73725500 3.28074900 4.27412400

C 4.90221100 2.38800900 4.87720400

C 5.41058900 4.01124600 6.29235500

C 3.86093900 2.23279000 7.16167100

C 5.42720100 4.82634100 7.54427800

C 6.64908200 4.48075300 8.39509700

C 5.33041100 6.31395800 7.22894700

C 7.73769100 3.25298500 2.77204600

C 8.54775300 2.30853100 2.21651100

C 9.77838900 3.98572900 2.97652500

C 11.03074100 2.10969800 1.87093400

C 10.97604200 4.84122000 3.24027200

C 10.65736300 6.31119500 2.99441000

C 11.54000000 4.59458900 4.63942100

C 5.78771800 4.62536400 2.23665200

C 4.98842100 4.90774100 1.17330500

C 5.70351300 6.80717200 2.07180200

C 4.20182200 7.03418200 0.07783300

C 5.85115300 8.26848000 2.33912100

C 4.74420300 8.73250800 3.28782200

C 7.22583700 8.62530700 2.88965900

H 4.41914400 1.48357900 4.52693600

H 3.50569400 1.27989000 6.76139600

H 4.42680300 2.04133100 8.07905000

H 2.99780800 2.86848800 7.38701700

H 4.53242900 4.54922000 8.12178300

H 6.65615300 3.41627600 8.66712600

H 7.58691300 4.68981300 7.86298500

H 6.64464400 5.06670800 9.32379600

H 5.40001400 6.90353700 8.15216800

H 6.13452000 6.64332700 6.55450800

H 4.37701400 6.55543500 6.74062700

H 8.34132900 1.36408200 1.72714600

H 11.80914100 2.10827100 2.63987900

H 10.77058800 1.07540000 1.63173700

H 11.40512000 2.60362000 0.96750700

H 11.74589200 4.54189700 2.51257900

H 11.53808900 6.92966800 3.21021800

H 10.36440700 6.48660400 1.95050600

H 9.83276100 6.66435600 3.63045700

H 11.81859000 3.54158800 4.78202300

H 12.43842100 5.20613500 4.79619100

H 10.80796300 4.85424400 5.41539300

H 4.45727500 4.27410700 0.47415300

H 3.43298900 7.65484400 0.54955100

H 4.88021100 7.66571000 -0.50502100

H 3.72074100 6.31791900 -0.59266200

H 5.72223400 8.78519800 1.37604200

H 4.84099100 8.23294600 4.26334300

H 4.81570600 9.81570600 3.45239200

H 3.74399100 8.51331300 2.89144500

H 7.36666100 8.23593400 3.91245700

H 8.03749000 8.24601500 2.25498300

H 7.32584400 9.71629600 2.95377700

H 5.90161000 1.42758500 2.45805400

O 8.65239500 5.98993800 5.85795700

H 8.18154700 6.36976900 6.62107900

H 9.35417400 6.63503000 5.65826700

$\kappa^1$  N bound <sup>iPr</sup>TICCu<sup>I</sup>(HNO<sub>2</sub>)

Cu 7.28425100 5.79861600 4.54322100

O 5.58482900 2.43462900 2.05766200

N 6.13470000 4.18386700 5.26565400

N 4.74542800 2.72344100 6.15638700

N 8.48221800 4.27367200 3.42505300

N 9.75936900 2.80294300 2.38745900

N 6.09891200 5.96055000 2.82392700

N 4.91805800 6.35225300 1.00448100

C 6.17283100 3.44591300 2.85274900

C 5.69583700 3.32691700 4.28014000

|   |             |            |             |                                                                          |             |            |             |
|---|-------------|------------|-------------|--------------------------------------------------------------------------|-------------|------------|-------------|
| C | 4.82940600  | 2.41818000 | 4.81479900  | H                                                                        | 10.18245300 | 4.83357500 | 5.68203700  |
| C | 5.54895300  | 3.79055500 | 6.39224900  | H                                                                        | 4.53076700  | 4.31628400 | 0.41706100  |
| C | 3.92806800  | 2.01039300 | 7.12549700  | H                                                                        | 3.35986300  | 7.61031200 | 0.34792900  |
| C | 5.69075600  | 4.43191200 | 7.73546900  | H                                                                        | 4.88599000  | 7.74435600 | -0.57552900 |
| C | 7.15391600  | 4.66952900 | 8.09079400  | H                                                                        | 3.84481400  | 6.31456100 | -0.77173200 |
| C | 4.85430700  | 5.71038200 | 7.78927900  | H                                                                        | 4.91941800  | 8.86830700 | 1.68224500  |
| C | 7.68010100  | 3.35263100 | 2.79183900  | H                                                                        | 6.76038000  | 8.51527000 | 4.09048700  |
| C | 8.45352300  | 2.43373300 | 2.14128700  | H                                                                        | 5.80630300  | 9.94343800 | 3.66640400  |
| C | 9.73281000  | 3.91958900 | 3.15970700  | H                                                                        | 4.98115900  | 8.46261300 | 4.20771400  |
| C | 10.93515500 | 2.10285700 | 1.89526800  | H                                                                        | 7.93369400  | 8.33747600 | 1.89632200  |
| C | 10.95302000 | 4.62910700 | 3.65138300  | H                                                                        | 7.03003000  | 8.51879200 | 0.37483500  |
| C | 10.93054000 | 6.09270300 | 3.21751700  | H                                                                        | 7.18380200  | 9.89798000 | 1.48641100  |
| C | 11.07840900 | 4.46252600 | 5.16552800  | H                                                                        | 5.85123900  | 1.56566600 | 2.40329400  |
| C | 5.73214400  | 4.75754500 | 2.25828200  | O                                                                        | 7.47314800  | 7.91545800 | 6.53547900  |
| C | 4.99898100  | 4.98205400 | 1.13140800  | H                                                                        | 6.53154500  | 7.77012400 | 6.29817000  |
| C | 5.59251100  | 6.90932800 | 2.04194500  | N                                                                        | 8.19859900  | 7.10122500 | 5.70893400  |
| C | 4.21298100  | 7.05418000 | -0.05608900 | O                                                                        | 9.36679500  | 7.22055000 | 5.91435500  |
| C | 5.77977700  | 8.38658200 | 2.17171700  |                                                                          |             |            |             |
| C | 5.82649700  | 8.84680700 | 3.61970100  |                                                                          |             |            |             |
| C | 7.05252100  | 8.80860900 | 1.43416500  |                                                                          |             |            |             |
| H | 4.27242000  | 1.59414600 | 4.38520700  | $\kappa^1$ O bound <sup>ipr</sup> TiCCu <sup>l</sup> (HNO <sub>2</sub> ) |             |            |             |
| H | 3.36001200  | 1.24206800 | 6.59471200  | Cu                                                                       | 7.39174600  | 5.67460100 | 4.43961400  |
| H | 4.55594000  | 1.52727700 | 7.88178400  | O                                                                        | 5.58963400  | 2.34694100 | 2.02863000  |
| H | 3.22513800  | 2.69395400 | 7.61372100  | N                                                                        | 6.09888000  | 4.23186000 | 5.16692900  |
| H | 5.27880400  | 3.73244200 | 8.47797000  | N                                                                        | 4.67887600  | 2.83241900 | 6.10042200  |
| H | 7.71398200  | 3.72535700 | 8.12643300  | N                                                                        | 8.47291500  | 4.24873100 | 3.34413300  |
| H | 7.64980900  | 5.32000000 | 7.35963900  | N                                                                        | 9.75943000  | 2.76545400 | 2.34482100  |
| H | 7.23190500  | 5.14920000 | 9.07544200  | N                                                                        | 6.04353500  | 5.89966400 | 2.69482100  |
| H | 4.99952500  | 6.23150400 | 8.74508400  | N                                                                        | 4.85306500  | 6.24559100 | 0.87049100  |
| H | 5.12774500  | 6.39772500 | 6.97653700  | C                                                                        | 6.16338000  | 3.39663400 | 2.78405000  |
| H | 3.78338400  | 5.48930700 | 7.67954600  | C                                                                        | 5.67762600  | 3.32958800 | 4.21493800  |
| H | 8.21369300  | 1.57336700 | 1.52759300  | C                                                                        | 4.79314600  | 2.45499600 | 4.77818100  |
| H | 11.56818900 | 1.78068400 | 2.72938400  | C                                                                        | 5.47760100  | 3.91249400 | 6.29424500  |
| H | 10.60401400 | 1.21855700 | 1.34429700  | C                                                                        | 3.84464100  | 2.17123000 | 7.09112500  |
| H | 11.51494400 | 2.74293400 | 1.22146600  | C                                                                        | 5.65752000  | 4.59739200 | 7.61115500  |
| H | 11.82924700 | 4.15361500 | 3.18654800  | C                                                                        | 6.96868700  | 4.14729400 | 8.25669600  |
| H | 11.79969100 | 6.62702200 | 3.62493100  | C                                                                        | 5.59993700  | 6.11274600 | 7.45773300  |
| H | 10.95849200 | 6.18019900 | 2.12269200  | C                                                                        | 7.67314400  | 3.30992200 | 2.73025500  |
| H | 10.02379900 | 6.60105900 | 3.57078900  | C                                                                        | 8.45614300  | 2.38347800 | 2.10311400  |
| H | 11.20888400 | 3.40496600 | 5.43552200  | C                                                                        | 9.72746500  | 3.89907700 | 3.09054200  |
| H | 11.94585600 | 5.02027900 | 5.54433700  | C                                                                        | 10.94162100 | 2.06518000 | 1.86835300  |
|   |             |            |             | C                                                                        | 10.94949000 | 4.60724600 | 3.58073600  |
|   |             |            |             | C                                                                        | 10.82297500 | 6.11426900 | 3.39126100  |

C 11.22124300 4.23459300 5.03909200  
 C 5.70749900 4.68513600 2.14463700  
 C 4.97007400 4.87721800 1.01118300  
 C 5.51122800 6.82448100 1.90888800  
 C 4.14751100 6.92020800 -0.20703900  
 C 5.62038300 8.30118000 2.12162600  
 C 5.11669000 8.68748400 3.51002400  
 C 7.05702200 8.76876600 1.89207900  
 H 4.23165300 1.61868300 4.37897400  
 H 3.33705500 1.33242600 6.60793800  
 H 4.45411400 1.78804000 7.91697700  
 H 3.08983700 2.86120900 7.48327400  
 H 4.82879800 4.28585900 8.26467500  
 H 6.98834900 3.05952200 8.41255000  
 H 7.82750100 4.41346000 7.62273600  
 H 7.10310400 4.63233000 9.23314100  
 H 5.71330300 6.59834700 8.43628800  
 H 6.40645100 6.47213500 6.80301300  
 H 4.64589800 6.44002500 7.02190900  
 H 8.22366500 1.50935400 1.50639100  
 H 11.59817500 1.80568200 2.70574000  
 H 10.62090500 1.14383300 1.37503800  
 H 11.49239100 2.67959800 1.14778500  
 H 11.80018500 4.25870700 2.97609000  
 H 11.72061100 6.62197700 3.76897800  
 H 10.70099400 6.37724100 2.33159400  
 H 9.95350500 6.50835700 3.93330800  
 H 11.39913700 3.15574700 5.15131500  
 H 12.10844000 4.76480900 5.41170200  
 H 10.36863100 4.50216100 5.67964900  
 H 4.52236100 4.19344500 0.30025000  
 H 3.29339300 7.48580900 0.18110800  
 H 4.82094700 7.59720900 -0.74399400  
 H 3.78042200 6.16362000 -0.90552600  
 H 4.97859300 8.79569400 1.37741800  
 H 5.71989500 8.21466800 4.29761900  
 H 5.17656000 9.77568800 3.64739900  
 H 4.07120500 8.38424200 3.65756000  
 H 7.74718900 8.28490300 2.59866100  
 H 7.39731300 8.53599300 0.87322000  
 H 7.13370800 9.85522000 2.03582600

H 5.85046900 1.49690500 2.42312700  
 O 9.21007600 6.71254900 6.57449300  
 H 9.82483500 7.04128800 7.26618400  
 N 8.72915200 7.82027200 5.96765900  
 O 7.96647200 7.52227900 5.08736100

$\kappa^1$  O(H) bound  $^{iPr}$ TICCu<sup>I</sup>(HNO<sub>2</sub>)

Cu 7.37345200 5.75655900 4.41271700  
 O 5.63419800 2.38480200 2.05443900  
 N 6.16199400 4.21558400 5.21856100  
 N 4.73133900 2.81305200 6.13551700  
 N 8.51128300 4.28880000 3.39231700  
 N 9.79772400 2.82201700 2.36561100  
 N 6.06689400 5.93684500 2.73921200  
 N 4.82805600 6.27833600 0.94779500  
 C 6.19978100 3.43201200 2.82041500  
 C 5.71844300 3.34213500 4.25203500  
 C 4.82477600 2.46702400 4.80261300  
 C 5.55516300 3.87163000 6.34502600  
 C 3.88219600 2.15543100 7.11591400  
 C 5.73276900 4.56944500 7.65521100  
 C 7.20963200 4.62321700 8.03787300  
 C 5.10711100 5.96217600 7.59143200  
 C 7.71136200 3.36099000 2.75934600  
 C 8.49480400 2.44819000 2.11228400  
 C 9.76439100 3.93898300 3.13833200  
 C 10.98062900 2.15443500 1.84825000  
 C 10.99206600 4.60013800 3.67745700  
 C 10.77935800 6.09264100 3.87731100  
 C 11.40143200 3.93770500 4.99526500  
 C 5.72401600 4.71962900 2.19537800  
 C 4.95585500 4.91053100 1.08312900  
 C 5.50866700 6.86056800 1.96803600  
 C 4.08963600 6.95362100 -0.10706800  
 C 5.65824700 8.33860700 2.13844200  
 C 5.50154700 8.73833800 3.60099700  
 C 7.00294800 8.78455400 1.55980700  
 H 4.25162700 1.64466600 4.39104300  
 H 3.32767300 1.35971000 6.61172400  
 H 4.48435000 1.71351800 7.91694600  
 H 3.16687800 2.86642300 7.54403600

|   |             |            |             |
|---|-------------|------------|-------------|
| H | 5.19973600  | 3.99081200 | 8.42422300  |
| H | 7.62160700  | 3.61596100 | 8.18752200  |
| H | 7.80642100  | 5.10913700 | 7.25176100  |
| H | 7.34329600  | 5.18778200 | 8.97047900  |
| H | 5.24218300  | 6.48980900 | 8.54542300  |
| H | 5.56954800  | 6.56521100 | 6.79553300  |
| H | 4.02937900  | 5.90717500 | 7.38254800  |
| H | 8.26245500  | 1.58800700 | 1.49543600  |
| H | 11.66281900 | 1.89021400 | 2.66301600  |
| H | 10.66680100 | 1.23746900 | 1.34228600  |
| H | 11.50309000 | 2.79478300 | 1.12865800  |
| H | 11.80148600 | 4.45114400 | 2.94523400  |
| H | 11.71081400 | 6.56683400 | 4.21422900  |
| H | 10.45269600 | 6.59101600 | 2.95402200  |
| H | 10.01314300 | 6.26702400 | 4.64587800  |
| H | 11.57905600 | 2.85969400 | 4.88051400  |
| H | 12.32251200 | 4.39348200 | 5.38346000  |
| H | 10.61136600 | 4.07203600 | 5.75034400  |
| H | 4.48948600  | 4.22535100 | 0.38579000  |
| H | 3.23192400  | 7.49676600 | 0.30465300  |
| H | 4.73982500  | 7.65172000 | -0.64542100 |
| H | 3.72528400  | 6.19980000 | -0.80990400 |
| H | 4.85901100  | 8.82797200 | 1.56139800  |
| H | 6.21364100  | 8.19536200 | 4.23663400  |
| H | 5.68229200  | 9.81462200 | 3.72564300  |
| H | 4.49110800  | 8.51601900 | 3.97055800  |
| H | 7.83286500  | 8.24687500 | 2.03976100  |
| H | 7.05775700  | 8.58796600 | 0.47984400  |
| H | 7.15543700  | 9.86111900 | 1.71801200  |
| H | 5.89796200  | 1.53386200 | 2.44494500  |
| O | 7.96571100  | 7.34423200 | 5.78209200  |
| H | 7.76628700  | 7.36490100 | 6.74359800  |
| N | 8.60013800  | 8.55618900 | 5.51574700  |
| O | 8.86373400  | 8.64464900 | 4.37068700  |
